# Supplementary material
Source: MDPI journal article supplement (https://www.mdpi.com/2076-3417/9/7/1421)
Supplement: s1 [file s1]

## Supporting Information

# Rotation of Liquid Metal Droplets Solely Driven by the Action of Magnetic Fields

Jian Shu <sup>1</sup>, Shi-Yang Tang <sup>2,\*</sup>, Sizepeng Zhao <sup>1</sup>, Zhihua Feng <sup>1</sup>, Haoyao Chen <sup>3</sup>, Xiangpeng Li <sup>4,\*</sup>, Weihua Li <sup>2</sup>,  
Shiwu Zhang <sup>1,\*</sup>

<sup>1</sup> CAS Key Laboratory of Mechanical Behavior and Design of Materials, Department of Precision Machinery and Precision Instrumentation, University of Science and Technology of China, Hefei, China; [jianshu@mail.ustc.edu.cn](mailto:jianshu@mail.ustc.edu.cn) (J. S.); [zsyp894345865@mail.ustc.edu.cn](mailto:zsyp894345865@mail.ustc.edu.cn) (S. Z.); [fff@ustc.edu.cn](mailto:fff@ustc.edu.cn) (Z. F.)

<sup>2</sup> School of Mechanical, Materials, Mechatronic and Biomedical Engineering, University of Wollongong, Australia; [weihuali@uow.edu.au](mailto:weihuali@uow.edu.au) (W. L.)

<sup>3</sup> School of Mechanical Engineering and Automation, State Key Laboratory of Robotics and System, Harbin Institute of Technology Shenzhen Graduate School, Shenzhen, China; [hychen5@hit.edu.cn](mailto:hychen5@hit.edu.cn) (H. C.)

<sup>4</sup> College of Mechanical and Electrical Engineering, Soochow University, Suzhou, China;

\* Correspondence: [swzhang@ustc.edu.cn](mailto:swzhang@ustc.edu.cn) (S. Z.); [shiyang@uow.edu.au](mailto:shiyang@uow.edu.au) (S.-Y. T.); [licool@suda.edu.cn](mailto:licool@suda.edu.cn) (X. L.)

**Keywords:** liquid metal; self-rotation; mixer; Lorentz force; EGaIn

### Supporting Information S1: Self-rotation of EGaIn droplets in different diameter tubes

In order to investigate the mechanism of the self-rotational speed partially decreasing as the droplet volume increases, we repeated the experiment using a larger diameter tube (diameter: 10 mm). As shown in Figure S1, at the beginning, the self-rotational speed of the droplet increases with the increase of the droplet volume, which is consistent with the performance in the 8 mm diameter tube. However, when the volume of EGaIn droplets is larger than 0.08 mL, the rotational speed decreases a little with the volume increase and eventually remains stable. Compared with the 8 mm diameter tube, the 10 mm tube has a larger threshold of 0.08 mL (the threshold for the 8 mm diameter tube is  $\sim 0.06$  mL). These demonstrate that the diameter of the tube affects the self-rotational speed; that is to say, the friction between the droplets and the sidewall of the tube might have a negative influence on the self-rotational speed.

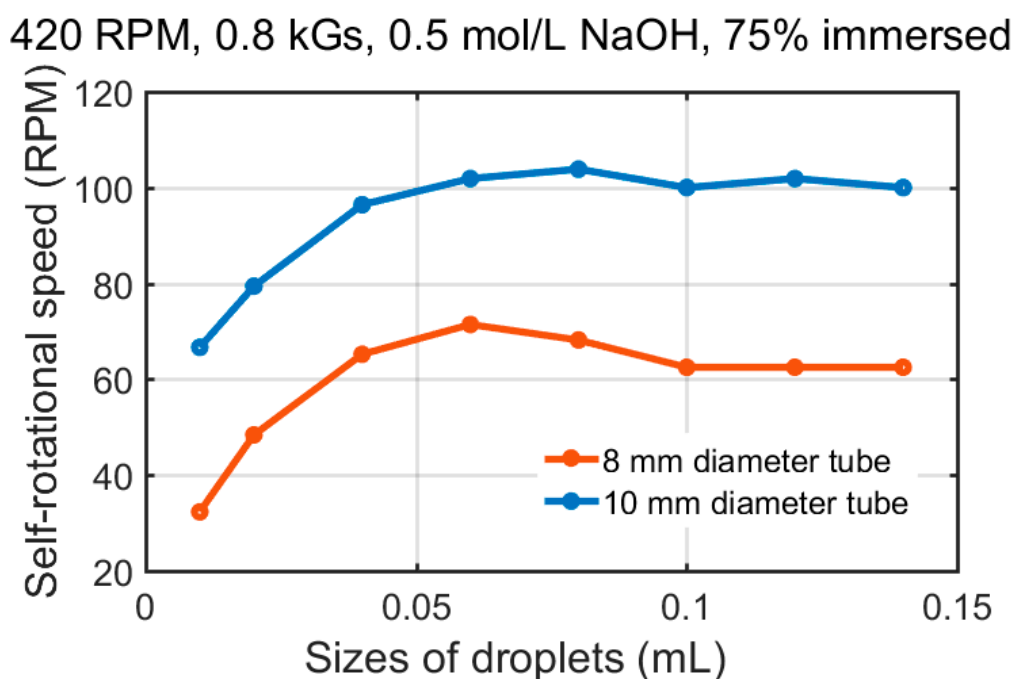

**Figure S1.** Plots of self-rotational speed vs. sizes of droplets.

Video S1: Self-rotation of liquid metal droplet.

Video S2: Mixer based on self-rotation of liquid metal droplet.

Figure S1. Plots of self-rotational speed vs. sizes of droplets.
